# Supplementary material for: Effects of nitrogen fertilization strategies on yield-related traits of rice cultivars with different yield types at panicle development stage
Source: Research Square preprint supplement (doi:10.21203/rs.3.rs-3159277/v1), 2023-08-08
Supplement: Supplementary file 1 [file 0b855bf0b8e027ff16742d50.xlsx]

## Sheet: Sheet1
Table 2. Average values for selected soil characteristics of composite topsoil samples (0-20 cm) from the experimental fields in 2021 and 2022.
Year	Organic matter (g kg−1)	Total N (g kg−1)	Available P (mg kg−1)	Available K(mg kg−1)	pH
2021	17.3	1.09	32.13	109.11	6.63
2022	16.7	1.11	33.32	108.26	6.74
