# Supplementary material for: Effects of nitrogen fertilization strategies on yield-related traits of rice cultivars with different yield types at panicle development stage
Source: Research Square preprint supplement (doi:10.21203/rs.3.rs-3159277/v1), 2023-08-08
Supplement: Supplementary file 2 [file 3eada5962b0fa7047186dc34.xlsx]

## Sheet: Sheet1
Table 4. Effects of different N fertilization strategies on the yield components of rice cultivars in 2021 and 2022, with the results of the three-way ANOVA.
Year	Cultivars	Treatment	Grain yield (GY, t ha-)	Effective panicles (EP, per m-2)	Grain per panicle (GPN)	Seed setting rate (SSR, %)	1,000-grain weight (TGW, g)
2022	DF114	N0	3.92e	150.95e	125.29e	90.32a	23.42ab
		N1	7.62d	279.87d	126.63d	85.82bc	23.91a
		N2	8.03c	310.41c	133.68c	85.31c	22.9bc
		N3	8.19b	340.87a	139.52b	86.92b	23.08b
		N4	8.4a	320.9b	143.07a	89.17a	22.38c
	LD11	N0	4.14d	179.77d	120.42a	90.28a	21.99b
		N1	7.5c	360.23c	111.06d	86.56b	22.88a
		N2	8.05b	394.33b	114.61c	86.92b	22.66a
		N3	8.21a	421.08a	117.7b	87.53b	22.74a
		N4	7.94b	417.00a	114.25c	87.92b	22.54a
2021	DF114	N0	4.1d	149.28e	132.48c	90.54a	23bc
		N1	7.7c	308.87d	131.5c	83.48b	23.62a
		N2	8.25b	345.6b	138.43b	84.86b	23.48a
		N3	8.28b	366.08a	139.49b	89.45a	22.75c
		N4	8.48a	334.02c	143.75a	90.72a	23.33ab
	LD11	N0	4.11d	190.72d	113.28b	91.23a	21.91c
		N1	7.76c	343.3c	109.7c	83.4c	22.52a
		N2	8.3b	383.74b	112.61b	84.64c	22.3ab
		N3	8.54a	397.74a	117.83a	84.66c	22.31ab
		N4	8.31b	387.37b	117.63a	87.46b	22.01bc
F-value	Y		113.91**	21.74**	11.84**	7.97**	4.99*
	113.91**
	C		1.53ns	4261.99**	4511.56**	7.2*	195.18**
	T		8139.46**	7707.18**	145.05**	91.62**	17.83**
	Y * C		5.48*	414.66**	64.25**	17.48**	15.17**
	Y * T		3.43*	8.62**	1.95ns	8.11**	4.41**
	C * T		19.4**	64.25**	69.4**	8.38**	7.65**
	Y * C * T		6.67**	47.71**	23.87**	5.1**	8.2**
