# Supplementary material for: Effects of nitrogen fertilization strategies on yield-related traits of rice cultivars with different yield types at panicle development stage
Source: Research Square preprint supplement (doi:10.21203/rs.3.rs-3159277/v1), 2023-08-08
Supplement: Supplementary file 3 [file 8a3e1db087b079204c31e00b.xlsx]

## Sheet: Sheet1
Table 3. Effects of different N fertilization strategies on the nitrogen recovery efficiency (NRE, %), partial factor productivity of applied nitrogen (PFPN, kg kg−1), nitrogen physiological efficiency (NPE, kg kg−1), and nitrogen agronomic use efficiency (NAE, kg kg−1) in rice cultivars in 2021 and 2022, with the results of the three-way ANOVA.
Year	Cultivars	Treatment	Nitrogen recovery efficiency (NRE, %)	Partial factor productivity of applied nitrogen (PFPN, kg kg−1)	Nitrogen agronomic use efficiency (NAE,kg kg−1)	Nitrogen physiological efficiency (NPE, kg kg−1)
2022	DF114	N0
		N1	20.55d	42.33d	52.09d	39.37c
		N2	22.81c	44.59c	55.17c	41.35ab
		N3	23.72b	45.50b	57.67b	41.14b
		N4	24.90a	46.68a	58.77a	42.37a
	LD11	N0
		N1	18.63c	41.65c	54.70c	34.06b
		N2	21.71ab	44.73b	56.54b	38.40a
		N3	22.58b	45.60a	58.47a	38.62a
		N4	21.09a	44.10b	56.58b	37.26a
2021	DF114	N0
		N1	19.96b	42.76b	53.72d	36.97b
		N2	23.42a	46.22a	56.80c	41.02a
		N3	23.40a	46.20a	58.56b	39.77a
		N4	24.30a	47.09a	59.77a	40.47a
	LD11	N0
		N1	20.29c	43.12c	52.93c	38.34c
		N2	23.28b	46.11b	54.40b	42.79b
		N3	24.59a	47.42a	56.01a	44.10a
		N4	23.31b	46.14b	55.43a	42.06b
F-value	Y		32.181**	103.838**	7.053*	46.558**
	C		43.129**	6.591*	69.647**	12.958**
	T		143.878**	204.269**	329.868**	57.94**
	Y * C		52.287**	13.296**	199.076**	173.043**
	Y * T		0.623ns	0.873ns	2.21ns	1.266ns
	C * T		12.726**	18.057**	59.435**	7.747**
Note: The different lowercase letters represent significant among treatments at 0.05 level, respectively. * and ** means different at 0.05 and 0.01 level, respectively. N, nitrogen rate; C, cultivar; Y, year, the same as below.
