# Supplementary material for: Effects of nitrogen fertilization strategies on yield-related traits of rice cultivars with different yield types at panicle development stage
Source: Research Square preprint supplement (doi:10.21203/rs.3.rs-3159277/v1), 2023-08-08
Supplement: Supplementary file 4 [file 8bba5519a803fa0e331d85f0.xlsx]

## Sheet: Sheet1
Table 1. Monthly temperature (°C), rainfall (mm), relative humidity (%) and sunshine hours (h) during the growth seasonin 2021 and 2022.
Month	Average temperature (°C )				Rainfall		Average relative humidity (%)		Total sunshine
	Minimum		Maximum		（mm）				hour (h)
	2021	2022	2021	2022	2021	2022	2021	2022	2021	2022
May	10.5	11	24.2	25.9	175.7	37.1	51.7	49.5	257.5	292.8
June	16.1	15.8	27.7	29.3	170.3	64.9	66.2	56.7	204	268.4
July	20.4	21.2	30	31.7	363.7	109.8	77.2	71.8	188.4	206.5
August	19.7	18.8	29.6	29.3	68.6	128.1	75.8	80.7	224.7	170.4
September	13.7	11.4	24.7	25.3	40.5	57.6	77.7	72.9	233.7	207.5
