# Supplementary material for: Effects of nitrogen fertilization strategies on yield-related traits of rice cultivars with different yield types at panicle development stage
Source: Research Square preprint supplement (doi:10.21203/rs.3.rs-3159277/v1), 2023-08-08
Supplement: Supplementary file 5 [file e7938e495ed85ef53499da55.xlsx]

## Sheet: Sheet1
Table 5. Effects of different N fertilization strategies on the floret growth and development of rice in 2021 and 2022, with the results of the three-way ANOVA.
Year	Cultivars	Treatment	Spikelets differentiated number (SDN)	Spikelets degraded number (SRN)	Spikelets surviving number	Degraded percentage (RP)
2022	DF114	N0	187.27a	61.98a	125.29d	0.33a
		N1	183.01a	56.38b	126.63d	0.31b
		N2	186.49a	52.81c	133.68c	0.28c
		N3	186.46a	46.94d	139.52b	0.25d
		N4	184.42a	41.35e	143.07a	0.22e
	LD11	N0	167.42a	47a	120.42a	0.28a
		N1	154.63c	43.57b	111.06d	0.28a
		N2	155.29c	40.68c	114.61c	0.26bc
		N3	157.82b	40.12c	117.7b	0.25c
		N4	154.95c	40.71c	114.25c	0.26b
2021	DF114	N0	183.21b	50.73b	132.48c	0.28b
		N1	185.81ab	54.31a	131.5c	0.29a
		N2	187.15a	48.72b	138.43b	0.26c
		N3	188.08a	48.59b	139.49b	0.26c
		N4	186.06a	42.3c	143.75a	0.23d
	LD11	N0	155.56bc	42.28b	113.28b	0.27c
		N1	154.28c	44.58a	109.7c	0.29a
		N2	157.71b	45.11a	112.61b	0.29ab
		N3	157.73b	39.89c	117.83a	0.25d
		N4	163.47a	45.84a	117.63a	0.28bc
F-value	Y		0.07ns	8.29**	11.84**	5.56*
	C		3986.71**	542.63**	4511.56**	0.22ns
	T		8.96**	95.54**	145.05**	171.19**
	Y * C		0.83ns	40.88**	64.25**	72**
	Y * T		23.94**	34.19**	1.95ns	25.14**
	C * T		8.52**	55.11**	69.4**	77.58**
	Y * C * T		7.73**	7.63**	23.87**	14.64**
